# Supplementary material for: Development of green fluorescent protein-based cAMP indicators for covering a wide range of cAMP concentrations
Source: Royal Society of Chemistry journal article supplement (doi:10.1039/d3ra01390a), 2023-01-01
Supplement: d3ra01390a1.pdf [file d3ra01390a1.pdf]

## **Supplementary Information**

### **Development of green fluorescent protein-based cAMP indicators for covering a wide range of cAMP concentrations**

Sohei Hiasa<sup>a</sup>, Takeru Fujimori<sup>a</sup>, Saki Aiki<sup>b</sup>, Hiroshi Ueda<sup>c</sup>, Takashi Tsuboi<sup>b\*</sup>, Tetsuya Kitaguchi<sup>c\*</sup>

<sup>a</sup>School of Life Science and Technology, Department of Life Science and Technology, Tokyo Institute of Technology 4259 Nagatsuta-cho, Midori-ku, Yokohama-shi, Kanagawa, 226-8501, Japan

<sup>b</sup>Department of Life Sciences, Graduate School of Arts and Sciences, The University of Tokyo, 3-8-1 Komaba, Meguro-ku, Tokyo 153-8902, Japan

<sup>c</sup>Laboratory for Chemistry and Life Science, Institute of Innovative Research, Tokyo Institute of Technology, 4259 Nagatsuta-cho, Midori-ku, Yokohama-shi, Kanagawa, 226-8503, Japan,

\* E-mail: [kitaguct-gfp@umin.ac.jp](mailto:kitaguct-gfp@umin.ac.jp), [takatsuboi@bio.c.u-tokyo.ac.jp](mailto:takatsuboi@bio.c.u-tokyo.ac.jp)

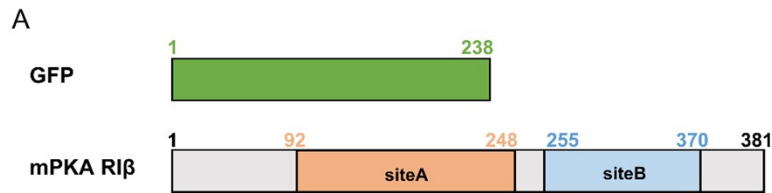

Table S1. Comparison of Single-FP based fluorescent cAMP indicator

| Sensor name   | Type     | Ex/Em (nm) | Dynamic range (fold) | EC <sub>50</sub> (μM) | Reference |
|---------------|----------|------------|----------------------|-----------------------|-----------|
| Flamindo      | Turn-off | 506/521    | 2.0                  | 2.1                   | 11        |
| Flamindo2     | Turn-off | 504/523    | 4.0                  | 3.2                   | 12        |
| Pink Flamindo | Turn-on  | 567/590    | 4.2                  | 7.2                   | 13        |
| cADDiS        | Turn-off | 488/525*   | 1.4                  | NA                    | 15        |
|               | Turn-on  | 488/525*   | 1.3                  | NA                    |           |
| cAMPr         | Turn-on  | 488/509    | 1.7                  | NA                    | 16        |
| gCarvi        | Turn-on  | 504/523    | 2.0                  | 1.5                   | 17        |
| G-Flamp1      | Turn-on  | 490/510    | 13                   | 2.2                   | 18        |

\* Wavelength used in the measurement

NA: Not applicable

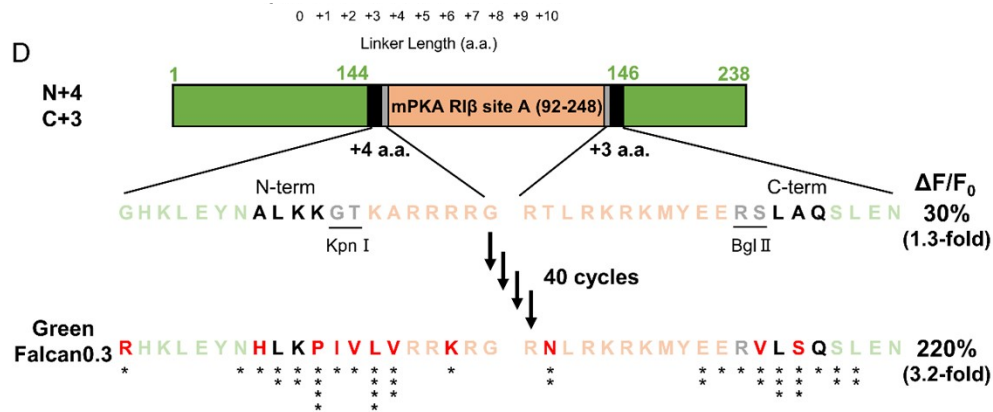

## Supplementary Figures

**Figure S1. Screening by the crude Green Falcan protein (A-C)** Diagram for (A) GFP, mouse cAMP-dependent protein kinase (PKA) type I-beta regulatory subunit (mPKA RIβ), and the indicators under development, and the screening results of various constructs with modified linker lengths at (B) the C-terminus and (C) the N-terminus. Responses to 100 μM cAMP are shown as ΔF/F<sub>0</sub>. (D) The amino acid

sequences around the linker and introduced point mutations. Asterisks indicate where random mutations were performed, and red letters indicate mutated amino acids.

## A Green Falcan0.3

|      |                                                                |      |
|------|----------------------------------------------------------------|------|
| 1    | ATGGCCGAGGAAAAGCGACAGCGTGGATTCTGCGGATGCAGAGGAGGATGACTCTGATGTC  | 60   |
| 61   | M A E E S D S V D S A D A E E D D S D V                        | 120  |
| 121  | TGGTGGGGTGGAGCGGACACAGACTACGCTGATGGCGGTGAAGACAAAGTAGTAGAAGTC   | 180  |
| 181  | W W G G A D T D Y A D G G E D K V V E V                        | 240  |
| 241  | GCCGAAGAGGAGGAAGTGGCTGATGTTGAGGAAGAGGAAGCTGATGATGATGAGGATGTG   | 300  |
| 301  | A E E E E V A D V E E E A D D D E D V                          | 360  |
| 361  | GAGGATGGGGACGAGGTGGAGGAGGAGGCCGAGGAGCCCTACGAAGAGGCCACCGAGAGA   | 420  |
| 421  | E D D G D E V E E E A E E P Y E E A T E R                      | 480  |
| 481  | ACAAACGAGCACTGCCACCACCACCACAACCACCACCTGAGTCCGTGGAGGAGGTGGGATCC | 540  |
| 541  | T T S T A T T T T T T E S V E E V G S                          | 600  |
| 601  | ATGGTGAGCAAGGGCGAGGAGCTGTTTACCGGGGTGGTGCCCATCCAGGTCGAGCTGGAC   | 660  |
| 661  | M V S K G E E L F T G V V P I Q V E L D                        | 720  |
| 721  | GGCGACGTAAACGGCCACAAGTTCAAGCTGCTCGGCGAGGGTGAGGGCGATGCCACCTAC   | 780  |
| 781  | G D V N G H K F S V S G E G E G D A T Y                        | 840  |
| 841  | GGCAAGCTGACCCTGAAGTTTCATCTGCACCACCGGCAAGCTGCCCGTGCCCTGGCCACC   | 900  |
| 901  | G K L T L K F I C T T G K L P V P W P T                        | 960  |
| 961  | CTCGTGACCACTGACCTACGGCGTGACGTCTTACGCCGCTACCCCGACCATGAAG        | 1020 |
| 1021 | L V T T L T Y G V Q C F S R Y P D H M K                        | 1080 |
| 1081 | CAGCAGCACTTCTTCAAGTCCGCCATGCCCGAAGGCTACATCCAGGAGCGCACCATCTTC   | 1140 |
| 1141 | Q H D F F K S A M P E G Y I Q E R T I F                        | 1200 |
| 1201 | TTCAAGGACGACCAACTACAAGACCCGCGCGAGGTGAAGTTTCGAGGGCGACACCTTG     | 1260 |
| 1261 | F K D D G N Y K T R A E V K F E G D T L                        | 1320 |
| 1321 | GTGAACCGCATCGAGCTGAAGGGCATCGACTTCAAGGAGGACGGCAACATCCTGCGGCAC   | 1380 |
| 1381 | V N R I E L K G I D F K E D G N I L R H                        | 1440 |
| 1441 | AAGCTGGAGTACAACCATTTAAAGCCTATTGTTTTGGTGCGTCGCAAGCGGGCGGGTGTG   | 1500 |
| 1501 | K L E Y N H L K P I V L V R R K R G G V                        | 1521 |
|      | AGTGCTGAAGTCTACACTGAAGAAGATGCTGTCTCTACGTGAGGAAGGTCAATCCCAAG    |      |
|      | S A E V Y T E E D A V S Y V R K V I P K                        |      |
|      | GACTATAAGACCATGACCGCTGGCCAAAGGCCATTTCTAAGAACGTGCTCTTTTCTCAC    |      |
|      | D Y K T M T A L A K A I S K N V L F S H                        |      |
|      | CTGGACGACAAACGAGAGAAGTGACATATTTGACGCCATGTTTCTGTCACTCACATCGGT   |      |
|      | L D D N E R S D I F D A M F P V T H I G                        |      |
|      | GGGGAACAGTCATACAGCAAGGGAATGAAGGAGATAATTTCTATGTGATTGACCAAGGA    |      |
|      | G E T V I Q Q G N E G D N F Y V I D Q G                        |      |
|      | GAAGTAGATGTATATGTGAACGGGGGAATGGGTGACCAACATCAGTGAGGGGGGAAGTTTC  |      |
|      | E V D V Y V N G E W V T N I S E G G S F                        |      |
|      | GGGAGCTGGCTCTCATCTACGGCACCCCGAGAGCGGCTACCGTGAAAGGCCAAGACGGAC   |      |
|      | G E L A L I Y G T P R A A T V K A K T D                        |      |
|      | CTCAAGCTCTGGGGTATCGACCGTGACAGCTACAGGCGCATCCTCATGGGACGCAATCTG   |      |
|      | L K L W G I D R D S Y R R I L M G R N L                        |      |
|      | AGGAAACGCAAGATGTATGAGGAGAGAGTGTATCTCAGTCACTGGAGAACGTCTATATC    |      |
|      | R K R K M Y E E R V L S Q S L E N V Y I                        |      |
|      | AATGCCGACAAGCAGAAGAACGGCATCAAGGCGAACTTCAAGATCCGCCACAACATCGAG   |      |
|      | N A D K Q K N G I K A N F K I R H N I E                        |      |
|      | GACGGCGGCGTGACGCTCGCCTACCACTACCAGCAGAACACCCCATCGGCGACGGCCCC    |      |
|      | D G G V Q L A Y H Y Q Q N T P I G D G F                        |      |
|      | GTGCTGCTGCCGACAACCACTACCTGAGCGTGACGTCCATACTTTTCGAAAGACCCCAAC   |      |
|      | V L L P D N H Y L S V Q S I L S K D P N                        |      |
|      | GAGAAAGCGCGATCACATGGTCTCTGCTGGAGTTCTGTGACCGCGCGGGGATCACTCTCGGC |      |
|      | E K R D H M V L L E F V T A A G I T L G                        |      |
|      | ATGGACGAGCTGTACAAGTAA                                          |      |
|      | M D E L Y K *                                                  |      |

## B Green Falcan1

|      |                                                               |      |
|------|---------------------------------------------------------------|------|
| 1    | ATGGCCGAGGAAAGCGACAGCGTGGATTCTGCGGATGCAGAGGAGGATGACTCTGATGTC  | 60   |
| 61   | M A E E S D S V D S A D A E E D D S D V                       | 120  |
| 121  | TGGTGGGGTGGAGCGGACACAGACTACGCTGATGGCGGTGAAGACAAAGTAGTAGAAGTC  | 180  |
| 181  | W W G G A D T D Y A D G G E D K V V E V                       | 240  |
| 241  | GCCGAAGAGGAGGAAGTGGCTGATGTTGAGGAAGAGGAAGCTGATGATGATGAGGATGTG  | 300  |
| 301  | A E E E E V A D V E E E E A D D E D V                         | 360  |
| 361  | GAGGATGGGGACGAGGTGGAGGAGGAGGCCGAGGAGCCCTACGAAGAGGCCACCGAGAGA  | 420  |
| 421  | E D G D E V E E A E E P Y E E A T E R                         | 480  |
| 481  | ACAACCAGCACTGCCACCACCACCAACCACCACTGAGTCCGTGGAGGAGGTGGGATCC    | 540  |
| 541  | T T S T A T T T T T T T E S V E E V G S                       | 600  |
| 601  | ATGGTGAGCAAGGGCGAGGAGCTGTTTACCGGGGTGGTGCCCATCCAGGTCGAGCTGGAC  | 660  |
| 661  | M V S K G E E L F T G V V P I Q V E L D                       | 720  |
| 721  | GGCGACGTAAACGGCCACAAGTTTCAGCGTGTCCGGCGAGGGTGAGGGCGATGCCACCTAC | 780  |
| 781  | G D V N G H K F S V S G E G E G D A T Y                       | 840  |
| 841  | GGGAGCTGACCCTGAAGTTTCATCTGCACCACCGGCAAGCTGCCCGTGCCCTGGCCCCAC  | 900  |
| 901  | G K L T L K F I C T T G K L P V P W P T                       | 960  |
| 961  | CTCGTGACACCTGACCTACGGCGTGCAGTCTTCAGCCGCTACCCGACACATGAAAG      | 1020 |
| 1021 | L V T T L T Y G V Q C F S R Y P D H M K                       | 1080 |
| 1081 | CAGCACGACTTCTTCAAGTCCGCCATGCCGAAGGCTACATCCAGGAGCGCACCATCTTC   | 1140 |
| 1141 | Q H D F F K S A M P E G Y I Q E R T I F                       | 1200 |
| 1201 | TTCAAGGACGACGGCAACTACAAGACCCGCGCGAGGTGAAGTTTCGAGGGCGACACCTG   | 1260 |
| 1261 | F K D D G N Y K T R A E V K F E G D A T L                     | 1320 |
| 1321 | GTGAACCGCATCGAGCTGAAGGGCATCGACTTCAAGGAGGACGGCAACATCCTGCGGCAC  | 1380 |
| 1381 | V N R I E L K G I D F K E D G N I L R H                       | 1440 |
| 1441 | AAGCTGGAGTACAACCATTTAAGCCTATTGTTTGGTGCGTCGCAAGCGGGCGGTGTG     | 1500 |
| 1501 | K L E Y N H L K P I V L V R R K R G G V                       | 1521 |
|      | AGTCTGAAGTCTACACTGAAGAAGATGCTGTCTCCTACGTGAGGAAGGTCAATCCCAAG   |      |
|      | S A E V Y T E E D A V S Y V R K V I P K                       |      |
|      | GACTATAAGACCATGACCGCGCTGGCCAAAGGCCATTTCTAAGAACGTGCTCTTTTCTCAC |      |
|      | D Y K T M T A L A K A I S K N V L F S H                       |      |
|      | CTGGACGACAACGAGAGAAGTGACATATTTGACGCCATGTTTCTGTCACTCACATCGGT   |      |
|      | L D D N E R S D I F D A M F P V T H I G                       |      |
|      | GGGAAAACAGTCATACAGCAAGGGAATGAAGGAGATAATTTCTATGTGATTGACCAAGGA  |      |
|      | G E T V I Q Q G N E G D N F Y V I D Q G                       |      |
|      | GAAGTAGATGTATATGTGAACGGGGAATGGGTGACCAACATCAGTGAGGGGGGAAGTTTC  |      |
|      | E V D V Y V N G E W V T N I S E G G S F                       |      |
|      | GGGGAGCTGGCTCTCATCTACGGCACCCAGACATGCTACCGTGAAGGCCAAGACGGAC    |      |
|      | G E L A L I Y G T P R H A T V K A K T D                       |      |
|      | CTCAAGCTCTGGGGTATCGACCGTGACAGCTACAGGCGCATCCTCATGGGACGCAATCTG  |      |
|      | L K L W G I D R D S Y R R I L M G R N L                       |      |
|      | AGGAAACGCAAGATGTATGAGGAGAGAGTGTATCTCAGTCACTGGAGAACGTCTATATC   |      |
|      | R K R K M Y E E R V L S Q S L E N V Y I                       |      |
|      | AATGCCGACAAGCAGAAAGAACGGCATCAAGGCGAACTTCAAGATCCGCCACAACATCGAG |      |
|      | N A D K Q K N G I K A N F K I R H N I E                       |      |
|      | GACGGCGGGCGTGCAGCTCGCCTACCACTACCAGCAGAACACCCCATCGGCGACGGCCCC  |      |
|      | D G G V Q L A Y H Y Q Q N T P I G D G P                       |      |
|      | GTGCTGCTGCGCCGACAACCACTACCTGAGCGTGCACTCCATACTTTTGAAGACCCCAAC  |      |
|      | V L L P D N H Y L S V Q S I L S K D P N                       |      |
|      | GAGAAGCGCATCACATGGTCTGCTGGAGTTTCGTGACCGCCGGGATCACTCTCGGC      |      |
|      | E K R D H M V L L E F V T A A G I T L G                       |      |
|      | ATGGACGAGCTGTACAAGTAA                                         |      |
|      | M D E L Y K *                                                 |      |



C

## Green Falcan3

```
1 ATGGCCGAGGAAAGCGACAGCGTGGATTCTGCGGATGCGAGGAGGATGACTCTGATGTC 60
  M A E E S D S V D S A D A E E D D S D V
61 TGGTGGGGTGGAGCGGACACAGACTACGCTGATGGCGGTGAAGACAAAGTAGTAGAAGTC 120
  W W G G A D T D Y A D G G E D K V V E V
121 GCCGAAGAGGAGGAAGTGGCTGATGTTGAGGAAGAGGAAGCTGATGATGATGAGGATGTG 180
  A E E E E V A D V E E E E A D D D E D V
181 GAGGATGGGGACGAGGTGGAGGAGGAGGCCGAGGAGCCCTACGAAGAGGCCACCGAGAGA 240
  E D G D E V E E E A E E P Y E E A T E R
241 ACAACCAGCACTGCCACCACCACCACAACCACCCTGAGTCCGTGGAGGAGGTGGGATCC 300
  T T S T A T T T T T T T E S V E E V G S
301 ATGGTGAAGCAAGGGCGAGGAGCTGTTACCGGGGTGGTGCCCATCCAGGTCGAGCTGGAC 360
  M V S K G E E L F T G V V P I Q V E L D
361 GCGCAGCTAAACGGCCACAAGTTTCAGCGTGTGCGCGAGGGTGAGGGCGATGCCACCTAC 420
  G D V N G H K F S V S G E G E G D A T Y
421 GGCACGCTGACCCTGAAGTTTCATCTGCACCACCAAGGCAAGCTGCCCGTGCCTGGCCACC 480
  G K L T L K F I C T T G K L P V P W P T
481 CTCGTGACCACCTGACCTACGGCGTGCAGTGCTTCAGCCGCTACCCGACCACATGAAG 540
  L V T T L T Y G V Q C F S R Y P D H M K
541 CAGCAGCACTTCTTCAAGTCCGCCATGCCCCGAAGGCTACATCCAGGAGCGCACCATCTTC 600
  Q H D F F K S A M P E G Y I Q E R T I F
601 TTCAAGGACGACGGCAACTACAAGACC CGCGCGAGGTGAAGTTTCGAGGGCGACACCTTG 660
  F K D D G N Y K T R A E V K F E G D A T
661 GTGAACCGCATCGAGCTGAAGGGCATCGACTTCAAGGAGGACGGCAACATCCTGCGGCAC 720
  V N R I E L K G I D F K E D G N I L R H
721 AAGTGGAGTACAACCATTAAAGCCTATTGTTTTGGTGCGTCGCAAGCGGGCGGTGTG 780
  K L E Y N H L K P I V L V R R K R G G V
781 AGTGCTGAAGTCTACACTGAAGAAGATGCTGTCTCTCAGTGAGGAAGGTCAATCCCAAG 840
  S A E V Y T E E D A V T S Y V R K V I P K
841 GACTATAAGACCATGACCGCGCTGGCCAAAGGCCATTTCTAAGAACGTGCTCTTTTCTCAC 900
  D Y K T M T A L A K A I S K N V L F S H
901 CTGGACGACAACGAGAGAAGTGACATATTTGACGCCATGTTTCTGTCTCACTCACATCGGT 960
  L D D N E R S D I F D A M F P V T H I G
961 GGGAAACAGTCATACAGCAAGGGGAATGAAGGAGATAATTTCTATGTGATTGACCAAGGA 1020
  G E T V I Q Q G N E G D N F Y V I D Q G
1021 GAAGTAGATGTATGTGAACGGGGAATGGGTGACCAACATCAGTGAGGGGGGAAGTTTC 1080
  E V D V Y V N G E W V T N I S E G G S F
1081 GGGAGCTGGCTCTCATCTACGGCACCCCCAGACATGGTTCCGTGAAGGCCAAGACGGAC 1140
  G E L A L I Y G T P R H G S V K A K T D
1141 CTCAAGCTCTGGGGTATCGACCGTGACAGCTACAGGCGCATCCTCATGGGACGCAATCTG 1200
  L K L W G I D R D S Y R R I L M G R N L
1201 AGGAAACGCAAGATGTATGAGGAGAGAGTGTTATCTCAGTCACTGGAGAACGTCTATATC 1260
  R K R K M Y E E R V L S Q S L E N V Y I
1261 AATGCCGACAAGCAGAAGAACGGCATCAAGGCGAACTTCAAGATCCGCCACAACATCGAG 1320
  N A D K Q K N G I K A N F K I R H N I E
1321 GACGGCGGCTGCACTCGCCTACCACCTACCAGCAGAACACCCCATCGGCGACGGCCCC 1380
  D G G V Q L A Y H Y Q Q N T P I G D G P
1381 GTGCTGCTGCCCGACAACCACTACCTGAGCGTGAGTCCATACTTTTGAAAGACCCCAAC 1440
  V L L P D N H Y L S V Q S I L S K D P N
1441 GAGAAAGCGGATCACATGGTCCTGCTGGAGTTCTGTGACCGCGCGGGATCACTCTCGGC 1500
  E K R D H M V L L E F V T A A G I T L G
1501 ATGGACGAGCTGTACAAGTAA 1521
  M D E L Y K *
```

| D    |                                                                 | Green Falcan10 |     |
|------|-----------------------------------------------------------------|----------------|-----|
| 1    | ATGGCCGAGGAAAGCGACAGCGTGGATTCTGCGGATGCAGAGGAGGATGACTCTGATGTC    | 60             |     |
| 61   | M A E E S D S V D S A D A E E D D S D V                         | 120            |     |
|      | TGGTGGGGTGGAGCGGACACAGACTACGCTGATGGCGGTGAAGACAAAGTAGTAGAAGTC    |                | 120 |
|      | W W G G A D T D Y A D G G E D K V V E V                         |                |     |
| 121  | GCCGAAGAGGAGGAAGTGGCTGATGTTGAGGAAGAGGAAGCTGATGATGATGAGGATGTG    | 180            |     |
|      | A E E E V A D V E E E E A D D D E D V                           |                |     |
| 181  | GAGGATGGGGACGAGGTGGAGGAGGAGGCCGAGGAGCCCTACGAAGAGGCCACCGAGAGA    | 240            |     |
|      | E D G D E V E E E A E E P Y E E A T E R                         |                |     |
| 241  | ACAACCAGCACTGCCACCACCACCACCAACCACCCTGAGTCCGTGGAGGAGGTGGGATCC    | 300            |     |
|      | T T S T A T T T T T T T E S V E E V G S                         |                |     |
| 301  | ATGGTGAGCAAGGGCGAGGAGCTGTTACCGGGGTGGTGCCCATCCAGGTTCGAGCTGGAC    | 360            |     |
|      | M V S K G E E L F T G V V P I Q V E L D                         |                |     |
| 361  | GGCGACGTAAACGGCCACAAGTTTCAGCTGTCTCCGGCAGGGGTGAGGGCGATGCCACCTAC  | 420            |     |
|      | G D V N G H K F S V S G E G E G D A T Y                         |                |     |
| 421  | GGCAAGCTGACCTGAAGTTTCATCTGACCAACCGGCAAGCTGCCCGTGCCCTGGCCACC     | 480            |     |
|      | G K L T L K F I C T T G K L P V P W P T                         |                |     |
| 481  | CTCGTGACCACTTGACCTACGGCGTGCACTGCTTTCAGCCGCTACCCGACCACATGAAG     | 540            |     |
|      | L V T T L T Y G V Q C F S R Y P D H M K                         |                |     |
| 541  | CAGCAGCACTTCTTCAAGTCCGCCATGCCCCGAAGGCTACATCCAGGAGCGCATCTTC      | 600            |     |
|      | Q H D G F F K S A M P E G Y I Q E R T I F                       |                |     |
| 601  | TTCAAGGACGAGCGCAACTACAAGACCCGCGCCGAGGTGAAGTTTCGAGGGCGACACCTTG   | 660            |     |
|      | F K D D G N Y K T R A E V K F E G D T Y                         |                |     |
| 661  | GTGAACCGCATCGAGCTGAAGGGCATCGACTTCAAGGAGGACGGCAACATCCTGCGGCAC    | 720            |     |
|      | V N R I E L K G I D F K E D G N I L R H                         |                |     |
| 721  | AAGCTGGAGTACAACCATTTAAAGCCTATTGTTTTGGTGCGTCGCAAGCGGGCGGTGTG     | 780            |     |
|      | K L E Y N H L K P I V L V R R K R G G V                         |                |     |
| 781  | AGTGCTGAAGTCTACACTGAAGAAGATGCTGTCTCTCTACGTGAGGAAGGTCTCCCAAG     | 840            |     |
|      | S A E V Y T E E D A V S Y V R K V I P K                         |                |     |
| 841  | GACTATAAGACCATGACCGCGCTGGCCAAAGGCCATTTCTAAGAACGTGCTCTTTCTC      | 900            |     |
|      | D Y K T M T A L A K A I S K N V L F S H                         |                |     |
| 901  | CTGGACGACAACGAGAGAAAGTGACATATTTGACGCCATGTTTCTGTCACTCACATCGGT    | 960            |     |
|      | L D D N E R S D I F D A M F P V T H I G                         |                |     |
| 961  | GGGAAACAGTCATACAGCAAGGGAATGAAGGAGATAATTTCTATGTGATTGACCAAGGA     | 1020           |     |
|      | G E T V I Q Q G N E G D N F Y V I D Q G                         |                |     |
| 1021 | GAAAGTAGATGTATATGTGAACGGGGAAATGGGTGACCAACATCAGTGAGGGGGGAAGTTTC  | 1080           |     |
|      | E A D V Y V N G E W V T N I S E G G S F                         |                |     |
| 1081 | GGGAGCTGGCTCTCATCTACGGCACCCCGACATTCTACCGTGAAGGCCAAGACGGAC       | 1140           |     |
|      | G E L A L I Y G T P R H S T V K A K T D                         |                |     |
| 1141 | CTCAAGCTCTGGGGTATCGACCGTGACAGCTACAGGCGCATCCTCATGGGACGCAATCTG    | 1200           |     |
|      | L K L W G I D R D S Y R R I L M G R N L                         |                |     |
| 1201 | AGGAAACGCAAGATGTATGAGGAGAGAGTGTATCTCAGTCACTGGAGAACGTCTATATC     | 1260           |     |
|      | R K R K M Y E E R V L S Q S L E N V Y I                         |                |     |
| 1261 | AATGCCGACAAGCAGAAAGAACGGCATCAAGGCGAACTTCAAGATCCGCCACAACATCGAG   | 1320           |     |
|      | N A D K Q K N G I K A N F K I R H N I E                         |                |     |
| 1321 | GACGGCGGGCTGCAGCTCGCCTACCACTACCAGCAGAACACCCCATCGGCGACGGCCCC     | 1380           |     |
|      | D G G V Q L A Y H Y Q Q N T P I G D G P                         |                |     |
| 1381 | GTGCTGGTGGCCGACAACCACTACCTGAGCGGTGCAAGTCCATACTTTTCGAAAGACCCCAAC | 1440           |     |
|      | V L L P D N H Y L S V Q S I L S K D P N                         |                |     |
| 1441 | GAGAAGCGCGATCACAATGGTCTGCTGGAGTTCTGTGACCGCGCGGGATCACTCTCGGC     | 1500           |     |
|      | E K R D H M V L L E F V T A A G I T L G                         |                |     |
| 1501 | ATGGACGAGCTGTACAAGTAA                                           | 1521           |     |
|      | M D E L Y K *                                                   |                |     |

**Figure S2. DNA and amino acid sequences of Green Falcans (A-D)** DNA and amino acid sequences of Green Falcan0.3 (A), 1 (B), 3 (C), 10 (D). Blue, green, orange, black and gray letters correspond to amino acid from APP, GFP, PKA, linker and restriction enzyme site, respectively. Asterisks showed stop codon.

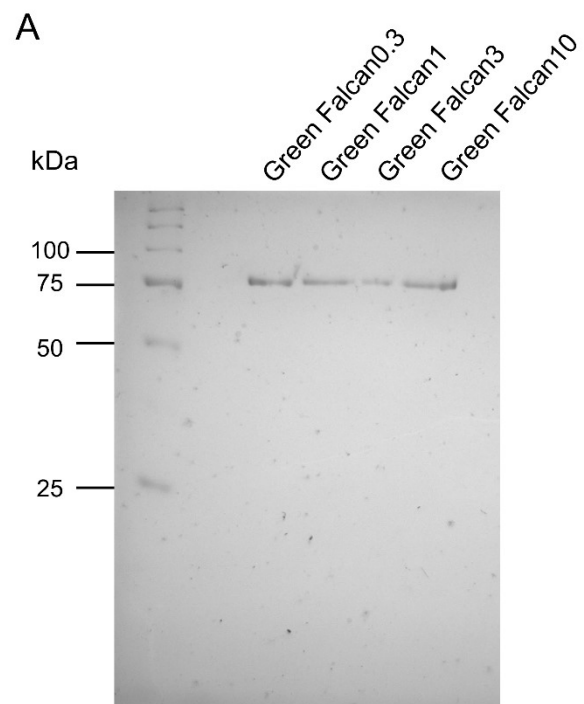

**Figure S3. SDS-PAGE for purified Green Falcans protein** (A) The image of SDS-PAGE for purified Green Falcans protein (1  $\mu$ g).

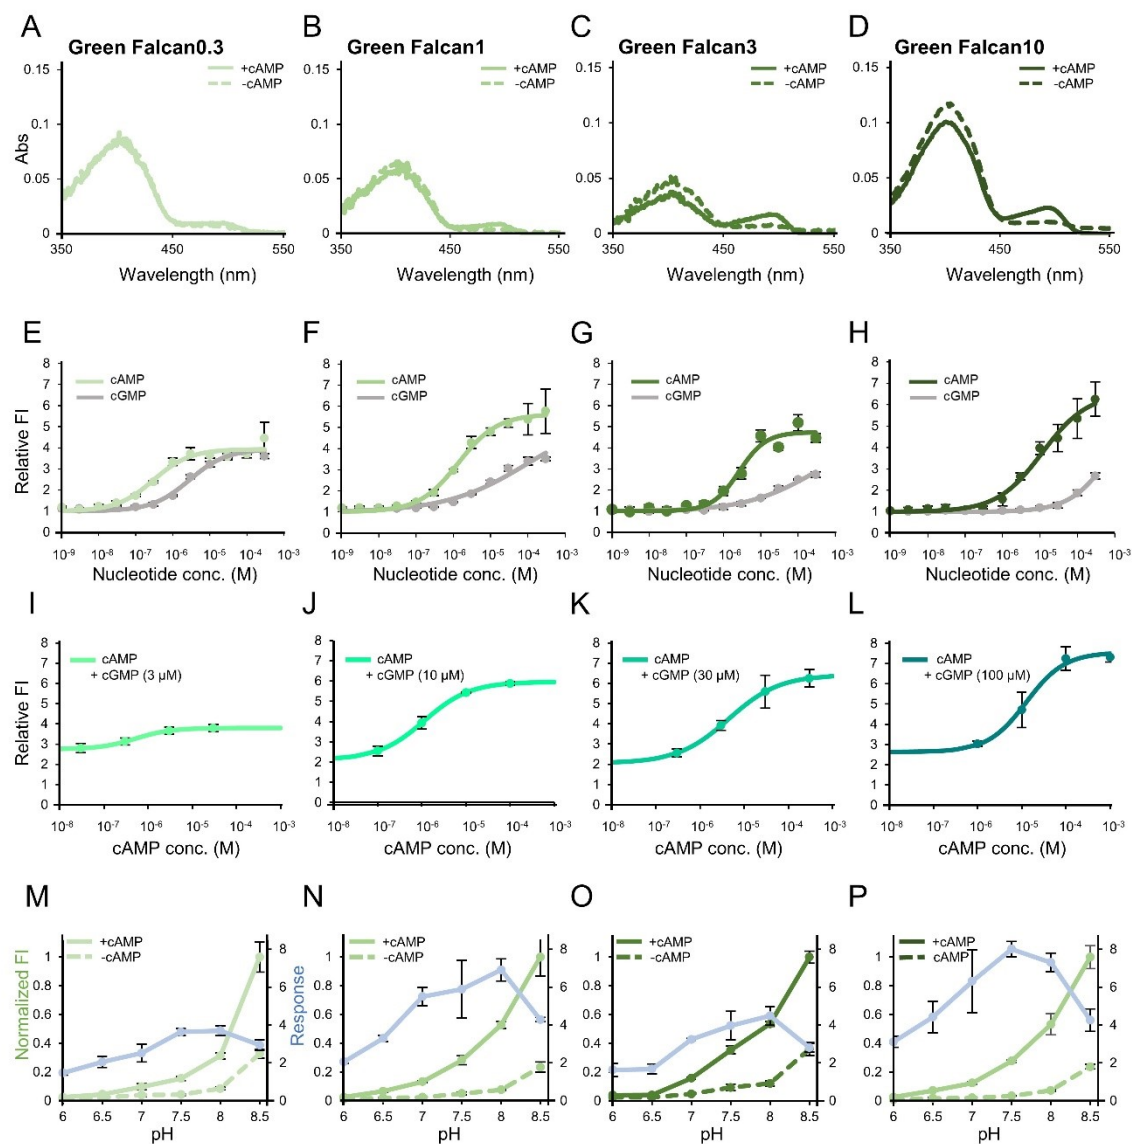

**Figure S4. Property evaluation of Green Falcans** (A-D) Absorption spectra of purified Green Falcans 0.3, 1, 3, and 10 in the presence (solid line) and absence (dashed line) of 100  $\mu$ M cAMP. (E-H) Dose-response curves of purified Green Falcans 0.3, 1, 3, and 10 for cAMP (green line) and cGMP (gray line). The FI was measured with excitation at 480 nm. The normalized FI was calculated by dividing by the FI of the peak in the absence of cAMP, and the minimum FI in fitting was normalized to 1. The data represent the means  $\pm$  standard deviation ( $n=3$ ). (I-L) Dose-response curves of purified Green Falcans 0.3, 1, 3, and 10 for cAMP in the presence of cGMP (10-times of the  $EC_{50}$  value for cAMP). The FI was measured with excitation at 480 nm. The Relative FI was calculated by dividing by the FI of the peak before the addition of cAMP.



The data represent the means  $\pm$  standard deviation (n=3). (M-P) pH sensitivity of purified Green Falcen0.3, 1, 3, 10. The FI was measured with excitation at 480 nm. The normalized FI was calculated by dividing the FI in all conditions by the FI of each Green Falcen after the addition of cAMP in pH 8.5. Response was calculated by dividing the FI with cAMP by the FI without cAMP for each pH condition. The data represent the means  $\pm$  standard deviation (n=3).

A

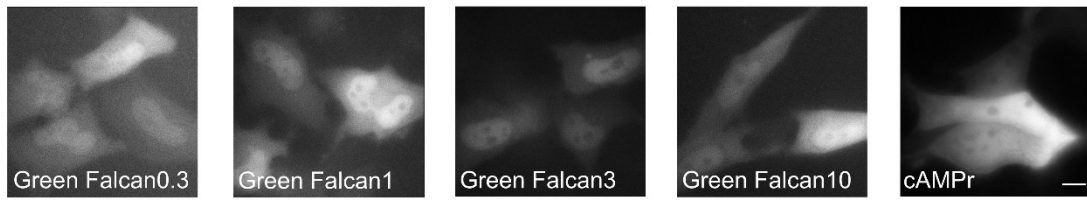

B

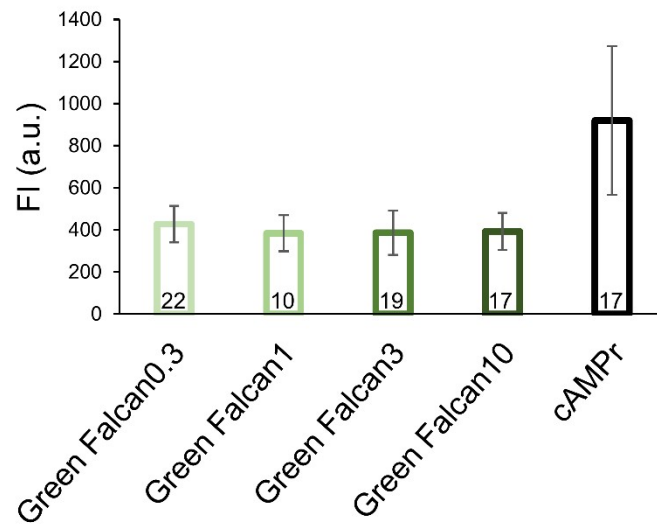

**Figure S5. Basal fluorescence intensity of Green Falcans and cAMPr** (A) Image of Green Falcans and cAMPr expressing HeLa cells. Scale bar represents 10  $\mu$ m. (B) Comparison of basal fluorescence intensity. The data represent the means  $\pm$  standard deviation. The numbers in bar graphs represent the number of cells showed 1.5 times higher than background, analyzed from three independent experiments.

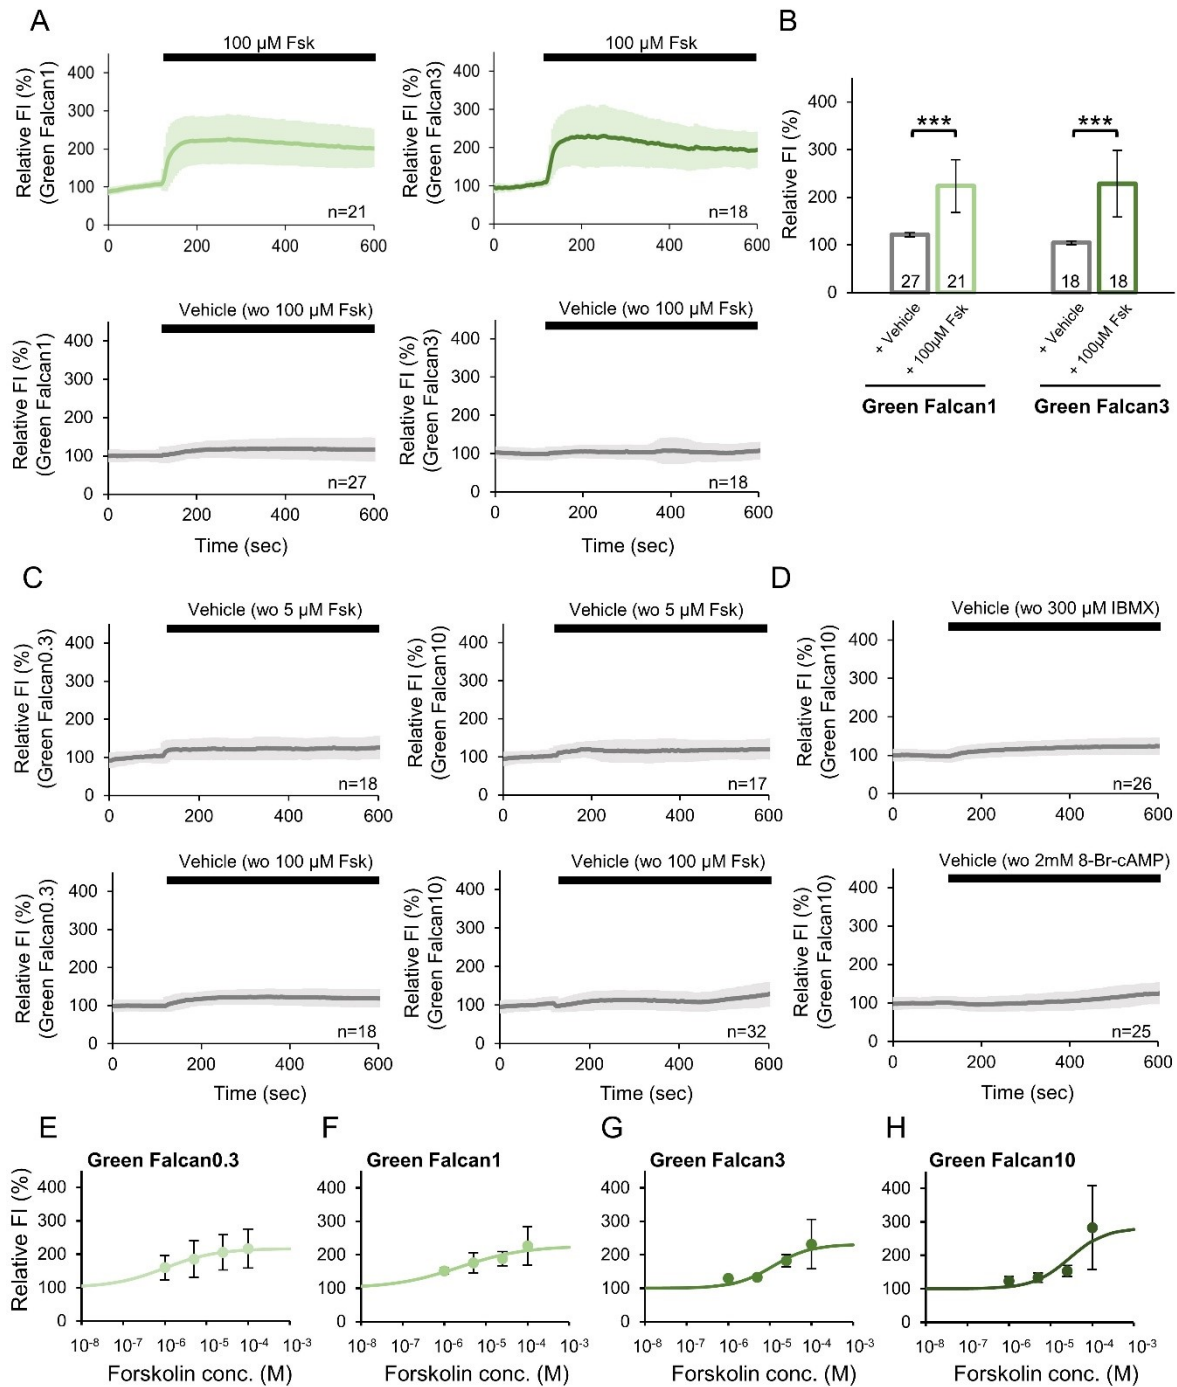

**Figure S6. Live-cell imaging using Green Falcans** (A) Time courses of fluorescence intensity (FI) in HeLa cells expressing Green Falcans1 and 3 in response to 100  $\mu$ M forskolin. Relative FI was calculated by dividing by the mean of the FI during the 2 min prior to administration. The data represent the means  $\pm$  standard deviation. The numbers in the lower right corner of the graphs represent the number of cells

analyzed from three independent experiments. (B) Comparison of relative FI at 2 min after the administration of DMSO (vehicle) or 100  $\mu$ M forskolin to HeLa cells expressing Green Falcans 1 and 3. The data represent the means  $\pm$  standard deviation. The numbers in bar graphs represent the number of cells analyzed from three independent experiments. \*\*\* $p < 0.001$ . (C) Time courses of fluorescence intensity (FI) in HeLa cells expressing Green Falcans 0.3 and 10 in response to vehicle (wo 5, 100  $\mu$ M forskolin). Relative FI was calculated by dividing by the mean of the FI during the 2 min prior to administration. (D) Time courses of fluorescence intensity (FI) in HeLa cells expressing Green Falcans 10 in response to vehicle (300  $\mu$ M IBMX or 2 mM 8-Br-cAMP). Relative FI was calculated by dividing by the mean of the FI during the 2 min prior to administration. (E-H) Dose-response curves of all Green Falcans for the administration of forskolin. Each plot showed the maximum relative FI during imaging (10 min) after the administration of forskolin. For curve fitting of all Green Falcans, the minimum relative FI was normalized to 100, and maximum relative FI to maximum value. For Green Falcans 10 fitting, the hill coefficient was fixed to 1. The data represent the means  $\pm$  standard deviation (n=3).

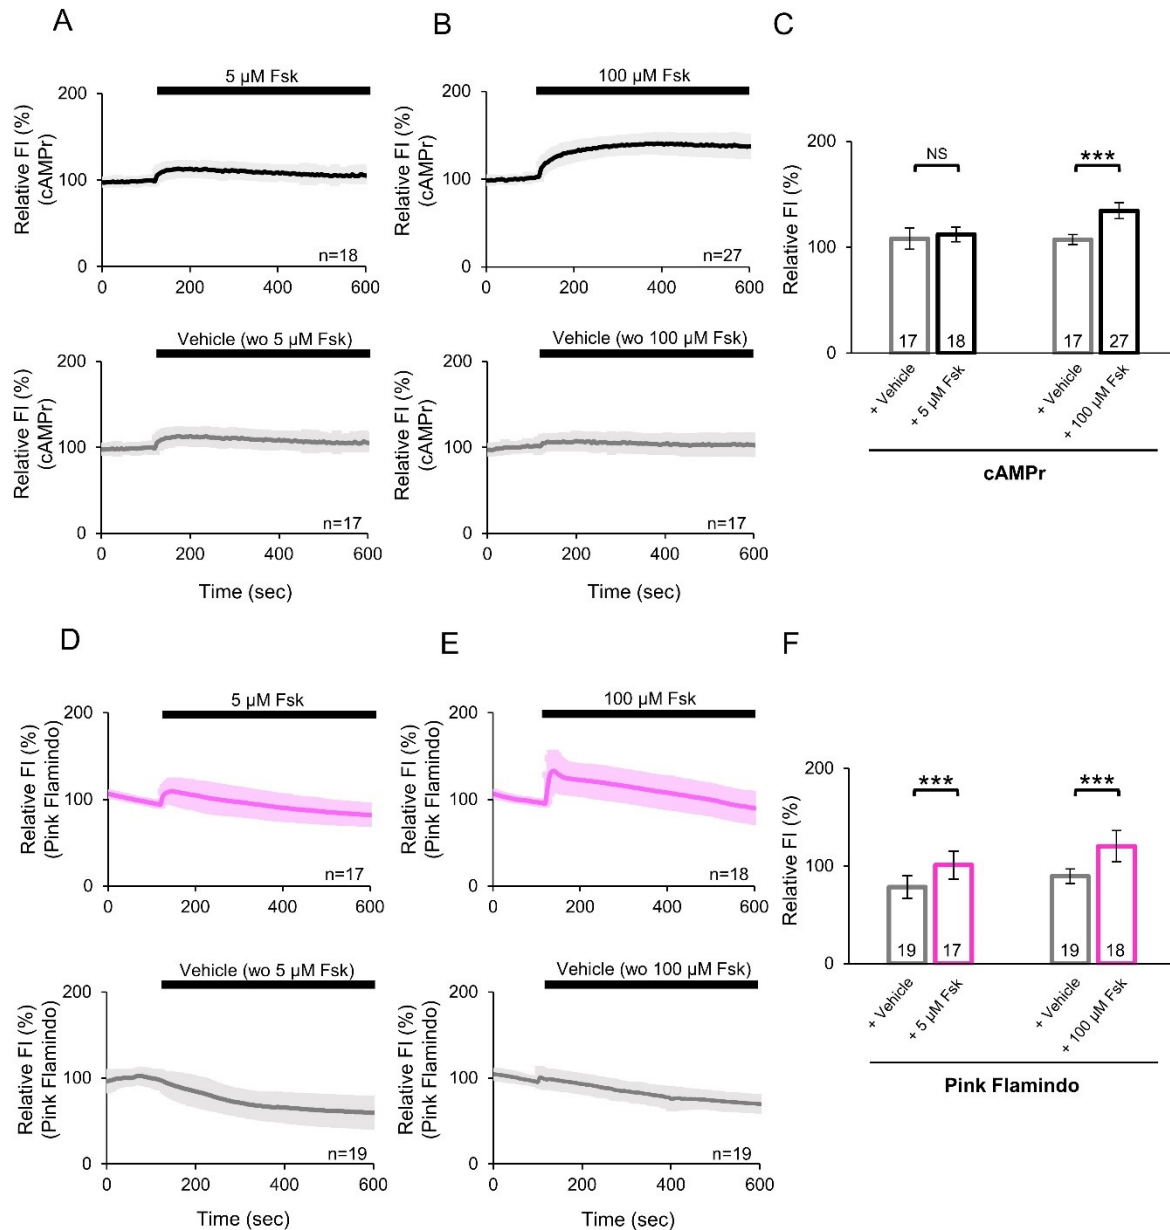

**Figure S7. Live-cell imaging using other cAMP indicators** (A, B) Time course of FI in HeLa cells expressing cAMPr in response to 5  $\mu$ M forskolin and DMSO (A), or 100  $\mu$ M forskolin and DMSO (B). The data represent the means  $\pm$  standard deviation. The numbers in the lower right corner of the graphs represent the number of cells analyzed from three independent experiments. (C) Comparison of relative FI at 2 min after the administration of DMSO (vehicle) or 5  $\mu$ M forskolin, and after that of DMSO (vehicle) or 100  $\mu$ M forskolin to HeLa cells expressing cAMPr. The data represent the means  $\pm$  standard deviation. The numbers in bar graphs represent the number of cells analyzed from three independent experiments.



\*\*\* $p < 0.001$ . (D, E) Time course of FI in HeLa cells expressing Pink Flamindo in response to 5  $\mu\text{M}$  forskolin and DMSO (D), or 100  $\mu\text{M}$  forskolin and DMSO (E). The data represent the means  $\pm$  standard deviation. The numbers in the lower right corner of the graphs represent the number of cells analyzed from three independent experiments. (F) Comparison of relative FI at 2 min after the administration of DMSO (vehicle) or 5  $\mu\text{M}$  forskolin, and after that of DMSO (vehicle) or 100  $\mu\text{M}$  forskolin to HeLa cells expressing Pink Flamindo. The data represent the means  $\pm$  standard deviation. The numbers in bar graphs represent the number of cells analyzed from three independent experiments. \*\*\* $p < 0.001$ .
